# Supplementary material for: Activating Transcription Factor 3 Protects against Restraint Stress-Induced Gastrointestinal Injury in Mice
Source: MDPI journal article supplement (doi:10.3390/cells10123530), 2021-12-14
Supplement: s1 [file s1]

**Supplemental information for:**

**Activating transcription factor 3 protects against restraint stress-induced gastrointestinal injury in mice**

Dun-Jie Chuang<sup>1</sup>, Subhashree Pethaperumal<sup>1</sup>, Bijaya Siwakoti<sup>1</sup>, Hung-Jen Chien<sup>2</sup>, Ching-Feng Cheng<sup>3,4</sup>, Shih-Che Hung<sup>5</sup>, Te-Sheng Lien<sup>1</sup>, Der-Shan Sun<sup>1,5</sup>, and Hsin-Hou Chang,<sup>1, 5\*</sup>

<sup>1</sup> Department of Molecular Biology and Human Genetics, Tzu-Chi University, Hualien, Taiwan.

<sup>2</sup> Institute of Biotechnology, National Tsing Hua University, Hsinchu, Taiwan

<sup>3</sup> Department of Pediatrics, Taipei Tzu Chi Hospital, Buddhist Tzu Chi Medical Foundation, Taipei, Taiwan

<sup>4</sup> Institute of Biomedical Sciences, Academia Sinica, Taipei, Taiwan

<sup>5</sup> Institute of Medical Sciences, Tzu-Chi University, Hualien, Taiwan.

**Running title: ATF3 rescues stress ulcer in mice**

**Key words:** Activating transcription factor 3, ATF3, gastrointestinal tract, intestinal leakage, tight junction, cell death, gut epithelial cell, gastric ulcer

\* Correspondence, Hsin-Hou Chang, E-mail: [hhchang@mail.tcu.edu.tw](mailto:hhchang@mail.tcu.edu.tw)

Figure S1 and Table S1

**Figure S1**

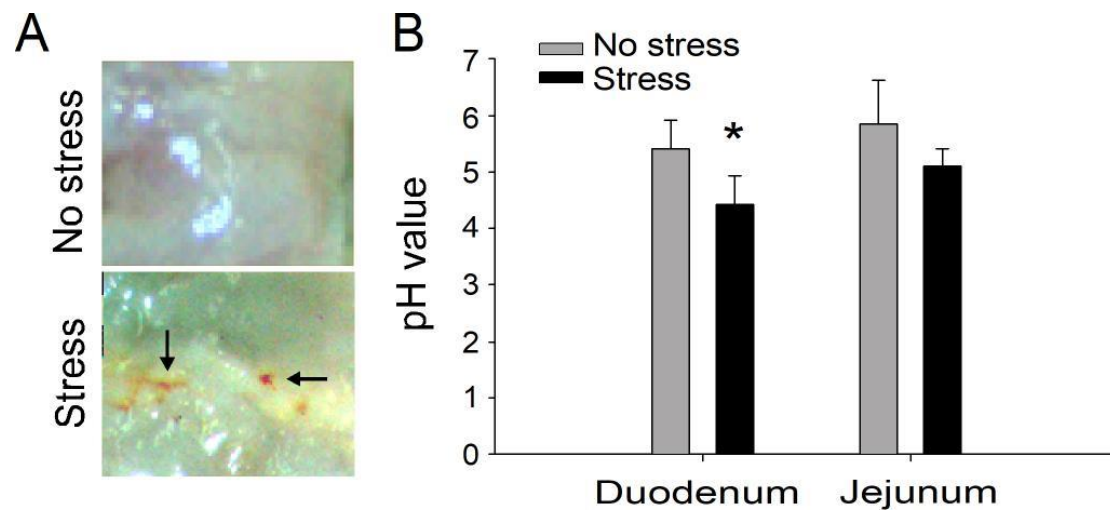

**Figure S1.** Stress induced GI abnormalities. (A) Representative image of hemorrhage lesions observed in GI tissue samples of stressed mice (arrows indicated regions), but not observed in tissue samples of no stress controls. (B) Duodenal tissue samples from 9-h stressed mice displayed lower pH value as compared to the no stress controls. By contrast, the analysis of the jejunum tissue samples does not display differences.  $n = 12$ , \*  $P < 0.05$ , vs. no stress control groups.

**Table S1****List of primers used in this report**

| <b>Gene symbol</b> | <b>Forward primer (5'→3')</b>    | <b>Reverse primer (5'→3')</b>    | <b>Product size (bp)</b> | <b>Temperature (°C)</b> |
|--------------------|----------------------------------|----------------------------------|--------------------------|-------------------------|
| <b>GAPDH</b>       | TCAACAGCAAC<br>TCCCACTCTTCC<br>A | ACCCTGTTGCT<br>GTAGCCGTATT<br>CA | 115                      | 55                      |
| <b>ZO-1</b>        | AGGACACCAAA<br>GCATGTGAG         | GGCATTCCTGC<br>TGGTTACA          | 87                       | 55                      |
| <b>Cldn3</b>       | CCACTACCAGC<br>AGTCGATGA         | GGAAGGGCGA<br>GGTTTCTTTG         | 211                      | 60                      |
| <b>Jam3</b>        | GGCTGCGACTTC<br>GACTGTA          | GAGATTCACTG<br>CCTCTATCATG<br>C  | 86                       | 55                      |
| <b>ATF3</b>        | AGTGACAGCAT<br>GAGCCCTCT         | GCAGCACTGA<br>CCTGATCAAA         | 179                      | 60                      |
